# Supplementary material for: Impact of a Ketogenic Diet on Metabolic Parameters in Patients with Obesity or Overweight and with or without Type 2 Diabetes: A Meta-Analysis of Randomized Controlled Trials
Source: MDPI journal article supplement (doi:10.3390/nu12072005), 2020-07-06
Supplement: s1 [file s1]

## Supplementary material

## (a) Fasting glucose

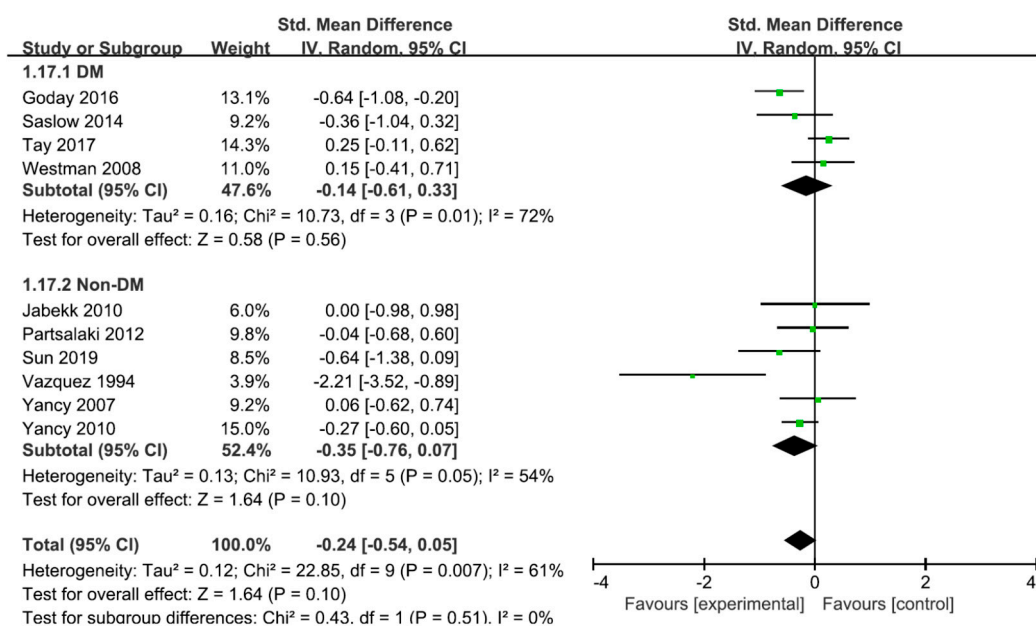

## (b) Fasting insulin

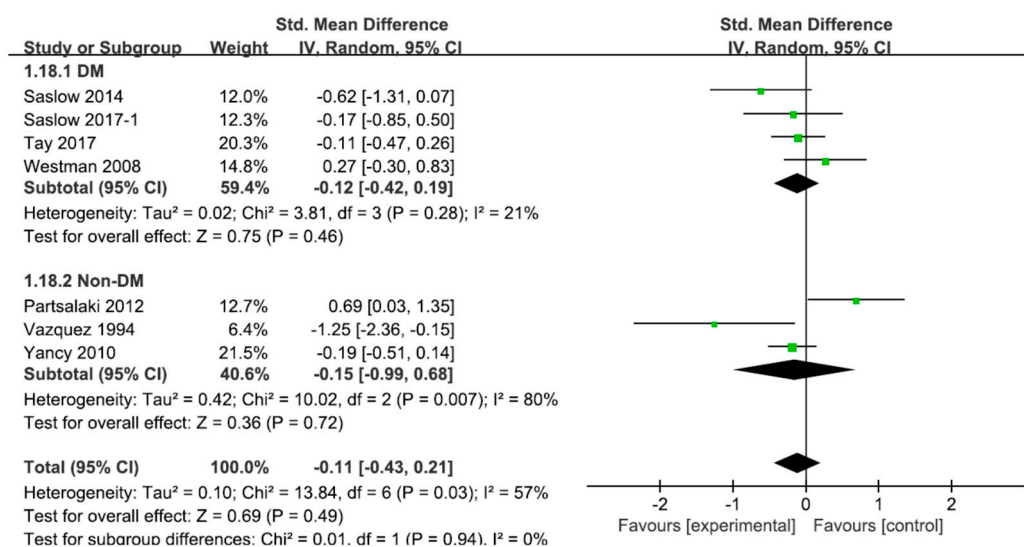

**Figure S1.** Forest plot for association between glycemic control and ketogenic diet in patients with overweight or obesity and with or without T2DM: (a) Changes in fasting glucose; (b) Changes in fasting insulin.

Abbreviations: CI, confidence interval; DM, diabetes mellitus; Non-DM, non-diabetes mellitus; T2DM, type 2 diabetes mellitus.

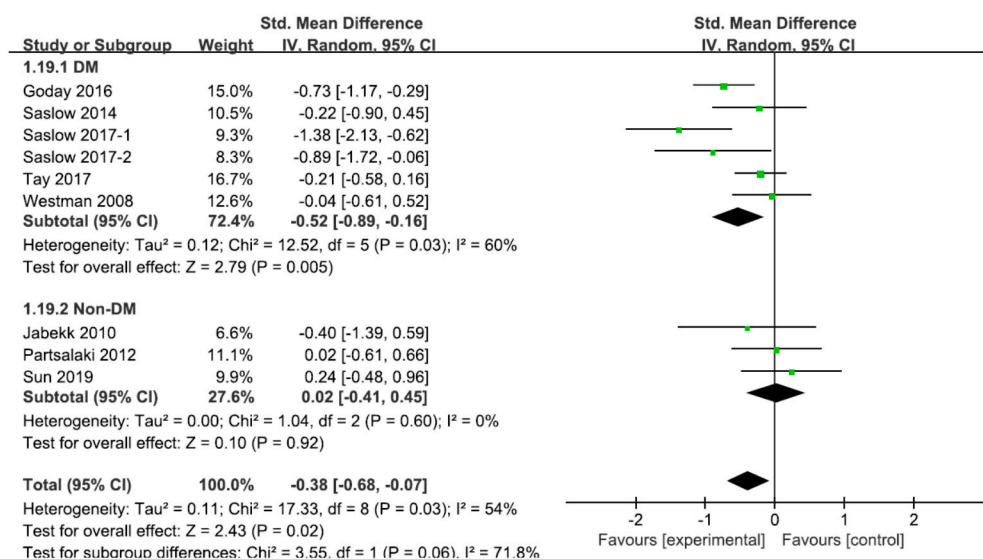

**Figure S2.** Forest plots for association between triglyceride control and ketogenic diet in patients with overweight or obesity and with or without T2DM.

Abbreviations: CI, confidence interval; DM, diabetes mellitus; Non-DM, non-diabetes mellitus; T2DM, type 2 diabetes mellitus.
